# Supplementary material for: Nuclear membrane protein SUN2 promotes replication of flaviviruses through modulating cytoskeleton reorganization mediated by NS1
Source: Springer Nature journal article supplement (doi:10.1038/s41467-023-44580-6), 2024-01-05
Supplement: MOESM1 [file 41467_2023_44580_MOESM1_ESM.pdf]

## Supplementary data

### **Nuclear membrane protein SUN2 promotes replication of flaviviruses through modulating cytoskeleton reorganization mediated by NS1**

Yanxia Huang<sup>1,2,3#</sup>, Qinyu Peng<sup>1,2#</sup>, Xu Tian<sup>1,2#</sup>, Cancan Chen<sup>4</sup>, Xuanfeng Zhu<sup>1,2</sup>, Changbai Huang<sup>1,2</sup>, Zhiting Huo<sup>1,2</sup>, Yang Liu<sup>5</sup>, Chao Yang<sup>3,6\*</sup>, Chao Liu<sup>1,2\*</sup>, Ping Zhang<sup>1,2\*</sup>

<sup>1</sup>Key Laboratory of Tropical Diseases Control (Sun Yat-sen University), Ministry of Education, Guangzhou, China

<sup>2</sup>Department of Immunology and Microbiology, Zhongshan School of Medicine, Sun Yat-sen University, Guangzhou, China

<sup>3</sup>Department of Neurosurgery, First Affiliated Hospital of Sun Yat-sen University, Guangzhou, 510080, China

<sup>4</sup>Department of Pathology, First Affiliated Hospital of Sun Yat-sen University, Guangzhou, 510080, China

<sup>5</sup>School of Biomedical Sciences, Li Ka Shing Faculty of Medicine, The University of Hong Kong, Hong Kong SAR, China

<sup>6</sup>Department of Neurosurgery, Guangxi Hospital Division of The First Affiliated Hospital, Sun Yat-sen University

\* Correspondence:

zhangp36@mail.sysu.edu.cn (PZ); liuchao9@mail.sysu.edu.cn (CL); ychao@mail.sysu.edu.cn (CY)

This PDF contains Supplementary figures, figure legends, and tables.

## Supplementary Figures and figure legends

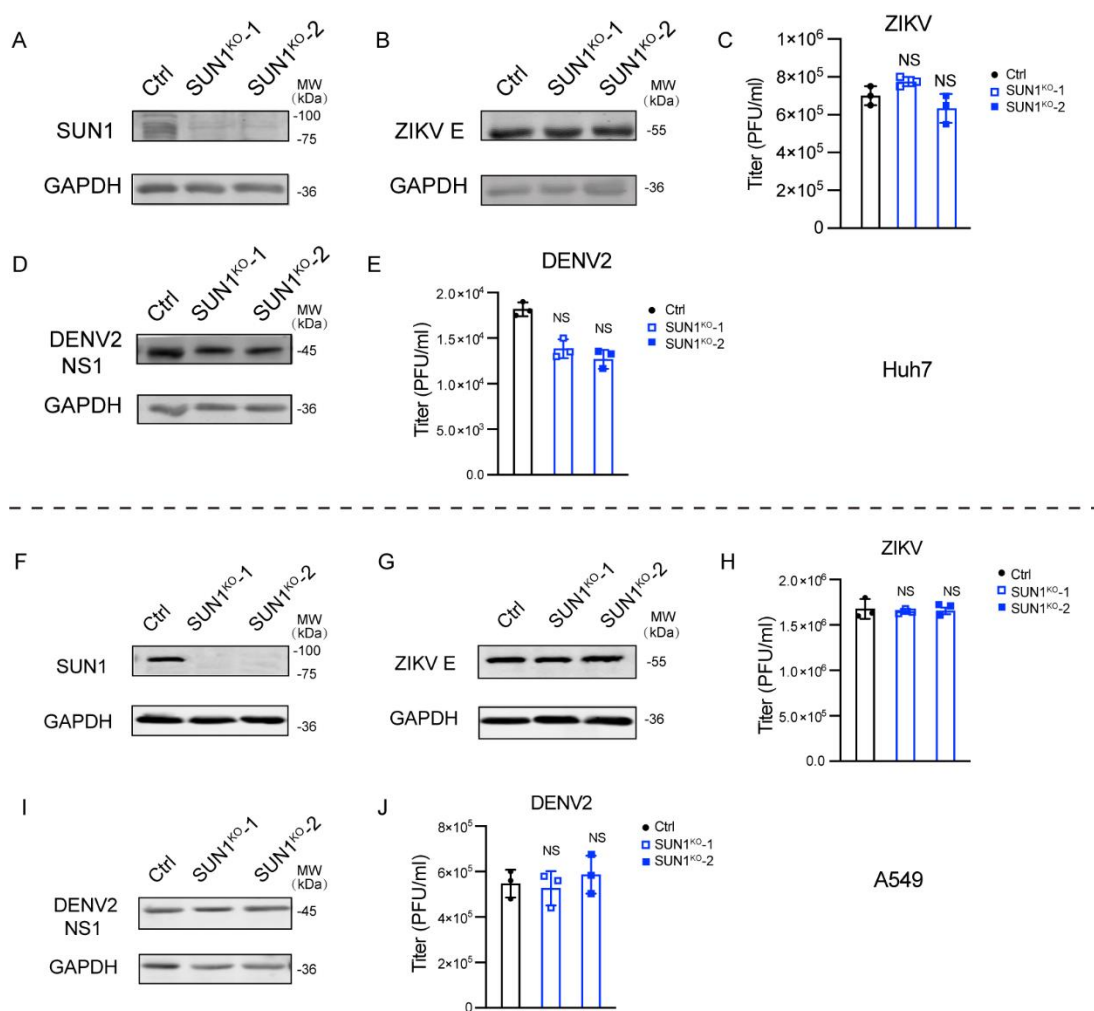

**Supplementary Figure 1. SUN1 is dispensable for ZIKV and DENV2 infection.** (A-E) Impact of SUN1 knockout on ZIKV or DENV2 replication in Huh7 cells. (A) Knockout efficiency of two SUN1 knockout clones (SUN1<sup>KO-1</sup> and SUN1<sup>KO-2</sup>) in Huh7 cells were confirmed by western blot using anti-SUN1 antibody. GAPDH was probed as a loading control. (B-E) Control and SUN1<sup>KO</sup> cells were infected with ZIKV (B-C) or DENV2 (D-E) at an MOI of 3. At 24 h p.i., cells were harvested for western blot (B and D) and supernatants were collected for plaque assay (C and E). (F-H) Impact of SUN1 knockout on ZIKV or DENV2 replication in A549 cells. Two SUN1 knockout clones (SUN1<sup>KO-1</sup> and SUN1<sup>KO-2</sup>) in A549 cells were validated by western blot (F). (G-J) Cells were infected with ZIKV (G-H) or DENV2 (I-J) at an MOI of 3. At 24 h p.i., cells were harvested for western blot (G and I) and supernatants were collected for plaque assay (H and J). (A, B, D, F, G, and I) Representative images of three independent experiments are shown. (C, E, H, and J) The data are shown as mean ± SD, n=3 biologically independent experiments. Statistical significance was determined using two-tailed unpaired *t* test (NS, no statistical significance). Source data are provided as a Source Data file.

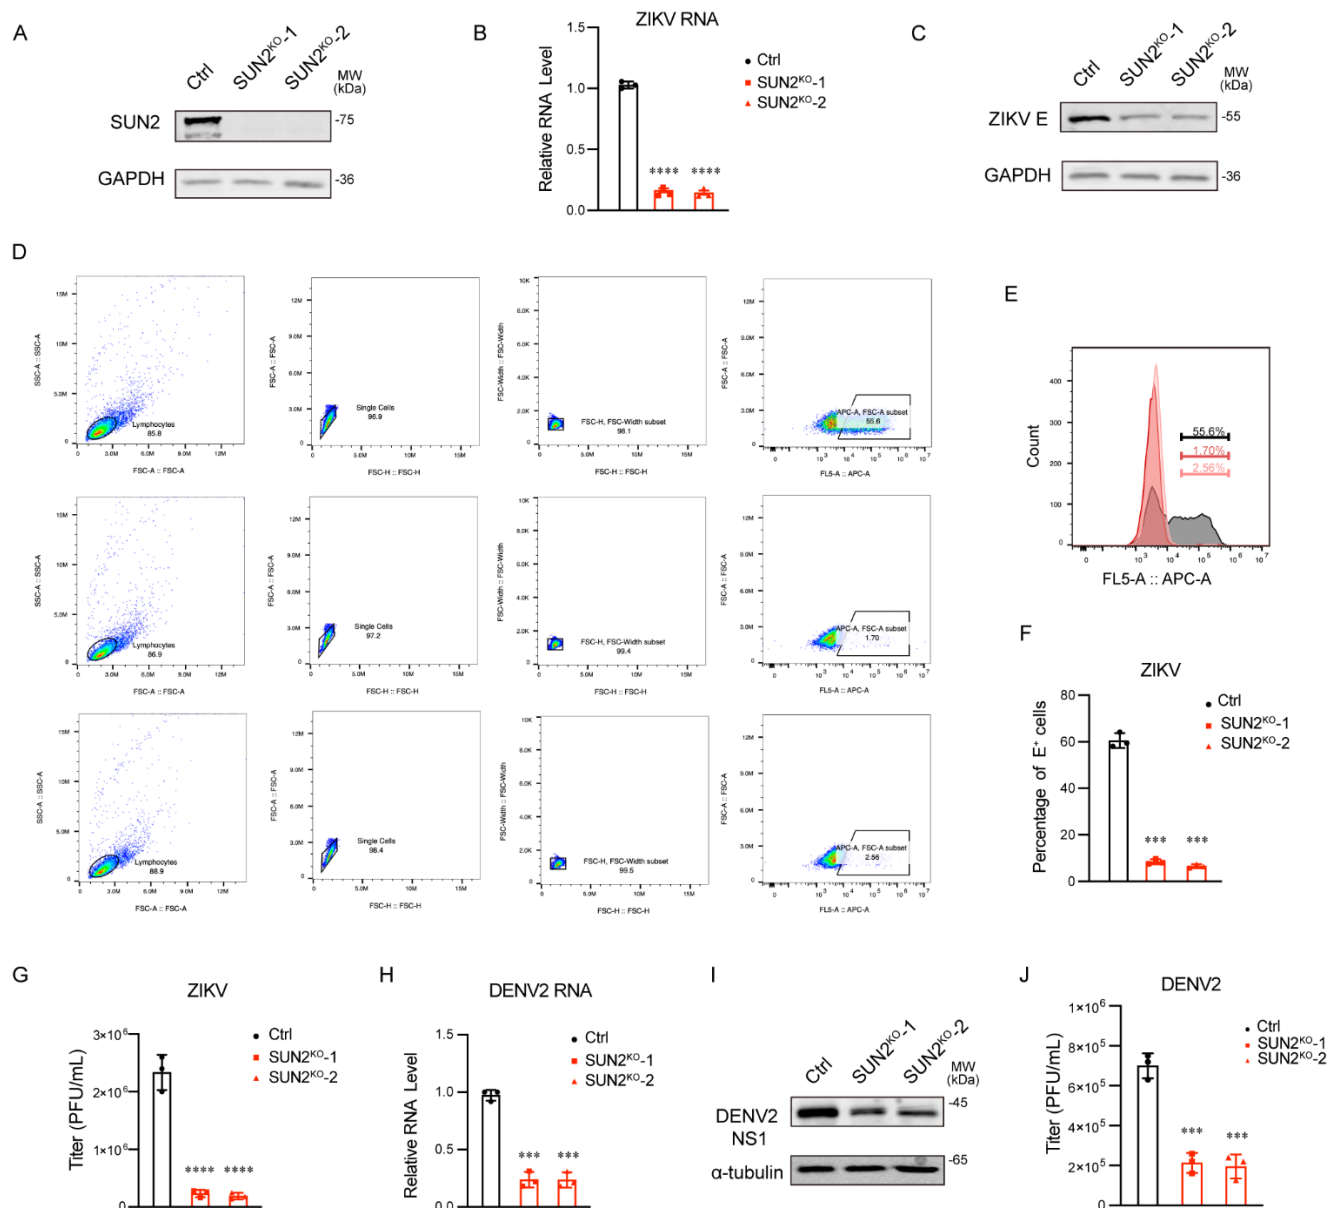

**Supplementary Figure 2. SUN2 promotes flavivirus infection in A549 cells.** (A) Knockout efficacy of two SUN2 knockout clones (SUN2<sup>KO-1</sup> and SUN2<sup>KO-2</sup>) in A549 cells were confirmed by western blot using anti-SUN2 antibody. GAPDH was probed as a loading control. (B-C), Control and SUN2<sup>KO-1</sup> and SUN2<sup>KO-2</sup> cells were infected with ZIKV at an MOI of 3. At 24 h p.i., cells were harvested for qRT-PCR (B), western blot (C). (D-F), Control and SUN2<sup>KO-1</sup> and SUN2<sup>KO-2</sup> cells were mock- infected or infected with ZIKV at an MOI of 3. At 24 h p.i., cells were harvested by staining with ZIKV E followed by flow cytometry. (D) Sequential gating strategy used to analyze infected cells (ZIKV E<sup>+</sup>) for Supplementary Fig. 2E and 2F. (G) Control and SUN2<sup>KO-1</sup> and SUN2<sup>KO-2</sup> cells were infected with ZIKV at an MOI of 3. At 24 h p.i., supernatants were collected for plaque assay. (H-J) Control and SUN2<sup>KO</sup> A549 cells were infected with DENV2

at an MOI of 3. At 24 h p.i., cells were harvested for qRT-PCR (H), or western blot (I), and supernatants were collected for plaque assay (J). (A, C, I) Representative images of three independent experiments are shown. (B, F, G, and J) The data are shown as mean  $\pm$  SD, n=3 biologically independent experiments. Statistical significance was determined using two-tailed unpaired *t* test (\*\*,  $P < 0.01$ ; \*\*\*,  $P < 0.001$ ; \*\*\*\*,  $P < 0.0001$ ). *p* values: (B)  $p < 0.0001$  (SUN2<sup>KO</sup>-1),  $p < 0.0001$  (SUN2<sup>KO</sup>-2); (F),  $p = 0.0006$  (SUN2<sup>KO</sup>-1),  $p = 0.0007$  (SUN2<sup>KO</sup>-2); (G)  $p < 0.0001$  (SUN2<sup>KO</sup>-1),  $p < 0.0001$  (SUN2<sup>KO</sup>-2); (H),  $p = 0.0001$  (SUN2<sup>KO</sup>-1),  $p = 0.0001$  (SUN2<sup>KO</sup>-2); (J),  $p = 0.0001$  (SUN2<sup>KO</sup>-1),  $p < 0.0001$  (SUN2<sup>KO</sup>-2). Source data are provided as a Source Data file.

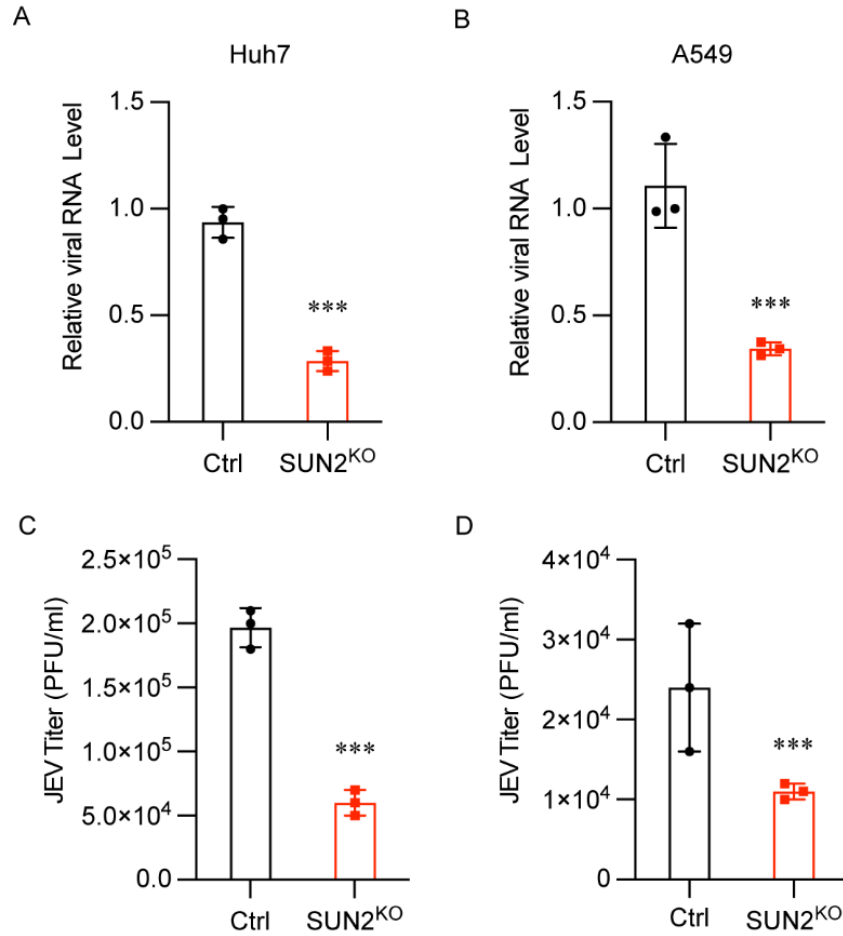

**Supplementary Figure 3. SUN2 promotes JEV infection in Huh7 and A549 cells.** Control and SUN2<sup>KO</sup> Huh7 and A549 cells were infected with JEV at an MOI of 3. Cells were harvested at 24 h p.i. for qRT-PCR (A and B), and supernatants were collected for plaque assay (C and D). The data are shown as mean ± SD, n=3 biologically independent experiments. Statistical significance was determined using two-tailed unpaired *t* test (\*\*\*, *P* < 0.001). *p* values: (A) *p* = 0.0002, (B) *p* = 0.0006, (C) *p* = 0.0002, (D) *p* = 0.0004. Source data are provided as a Source Data file.

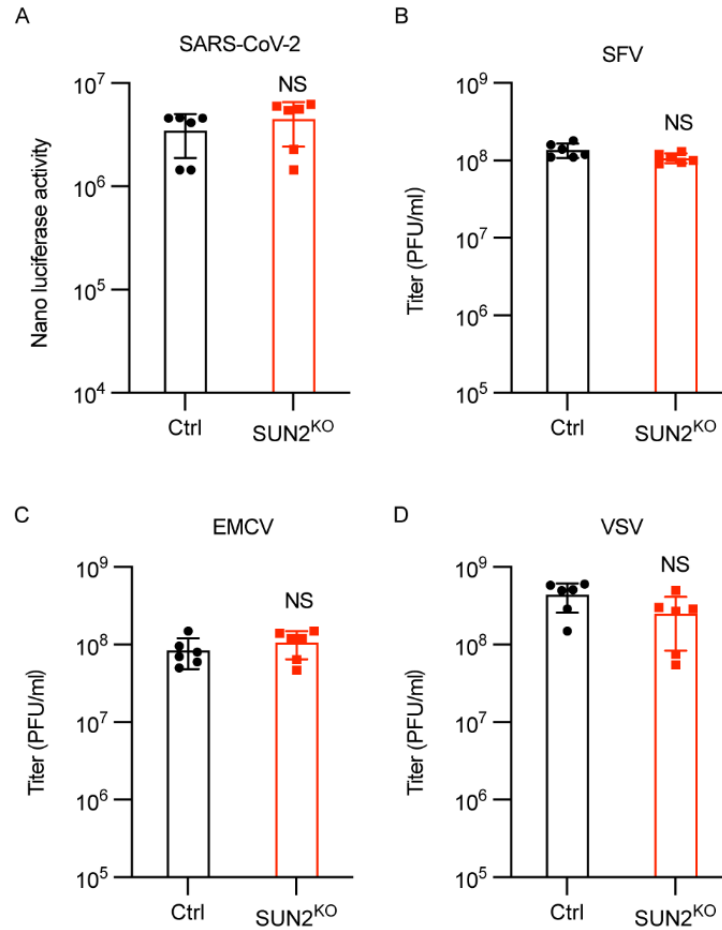

**Supplementary Figure 4. SUN2 is dispensable for non-flavivirus infection.**

(A) SARS-CoV-2 replicon assay. Control and  $SUN2^{KO}$  Huh7 cells were transfected with SARS-CoV-2 replicon. Cells were harvested at 24 h p.i. for the luciferase assay. (B-D) Control and  $SUN2^{KO}$  Huh7 cells were infected with SFV (B), EMCV (C), or VSV (D) at an MOI of 3. At 24 h p.i., cells and supernatants were collected for plaque assay. The data are shown as mean  $\pm$  SD,  $n=6$  biologically independent samples. Statistical significance was determined using two-tailed unpaired  $t$  test (NS, no statistical significance). Source data are provided as a Source Data file.

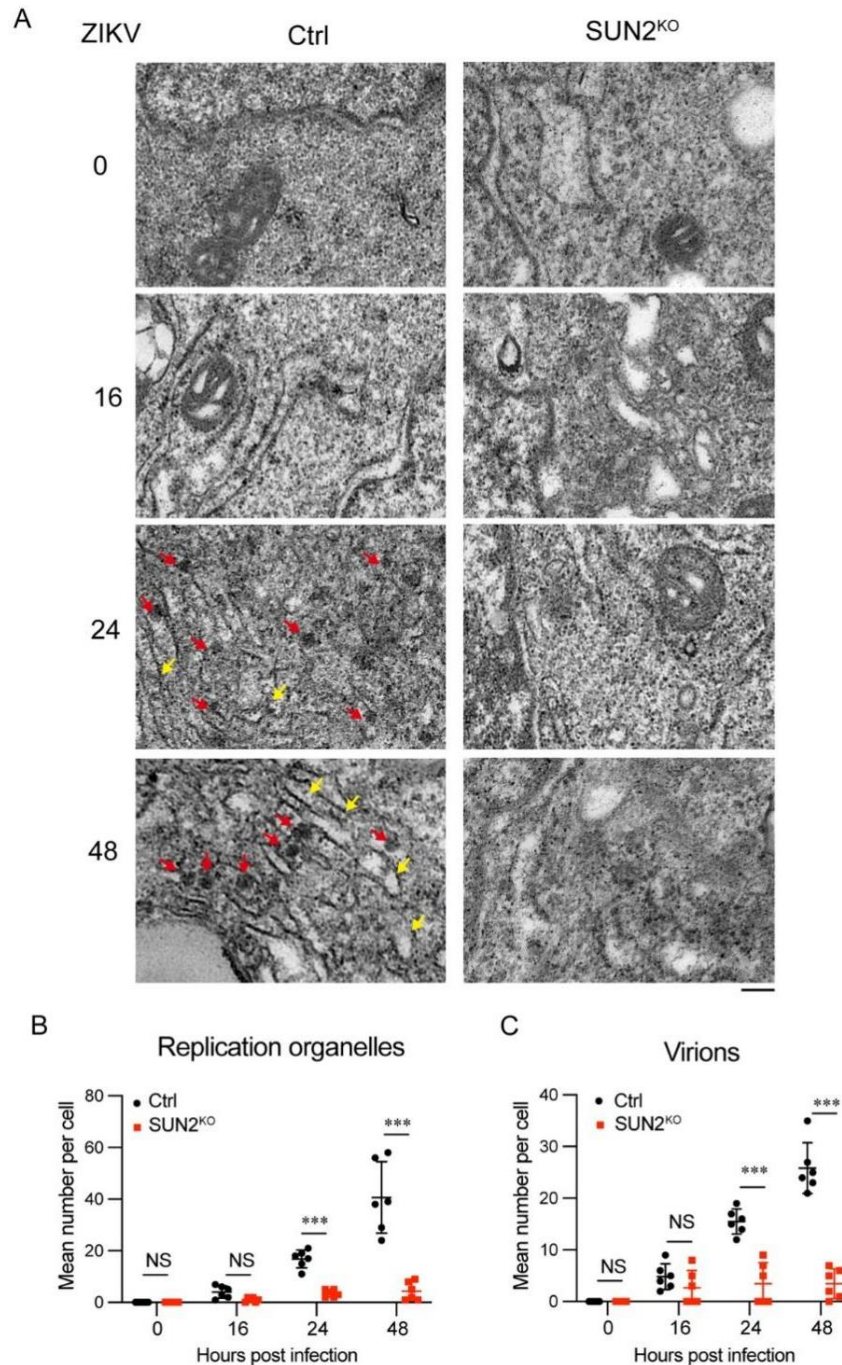

**Supplementary Figure 5. Depletion of SUN2 decreases the ROs formation and virion amount.** (A) ER morphologies. Control and SUN2<sup>KO</sup> Huh7 cells were infected with ZIKV at an MOI of 3. Cells were fixed and processed for TEM analysis at 0, 16, 24, and 48 h p.i. ROs were indicated with yellow arrows and viral particles were indicated with red arrows. Representative images of three independent experiments are shown. Scale bars, 100 nm. (B-C) Quantitation of ROs (B), and virions (C) in control and SUN2<sup>KO</sup> cells (n = 6 cells per condition). Graphs show

the mean number per cell counted; error bars represent Mean  $\pm$  SD. Statistical significance was determined using two-way ANOVA (NS, no statistical significance; \*\*\*,  $P < 0.001$ ).  $p$  values: (B)  $p = 0.0004$  (24 h),  $p = 0.0005$  (48 h), (C)  $p = 0.0001$  (24 h),  $p = 0.0004$  (48 h). Source data are provided as a Source Data file.



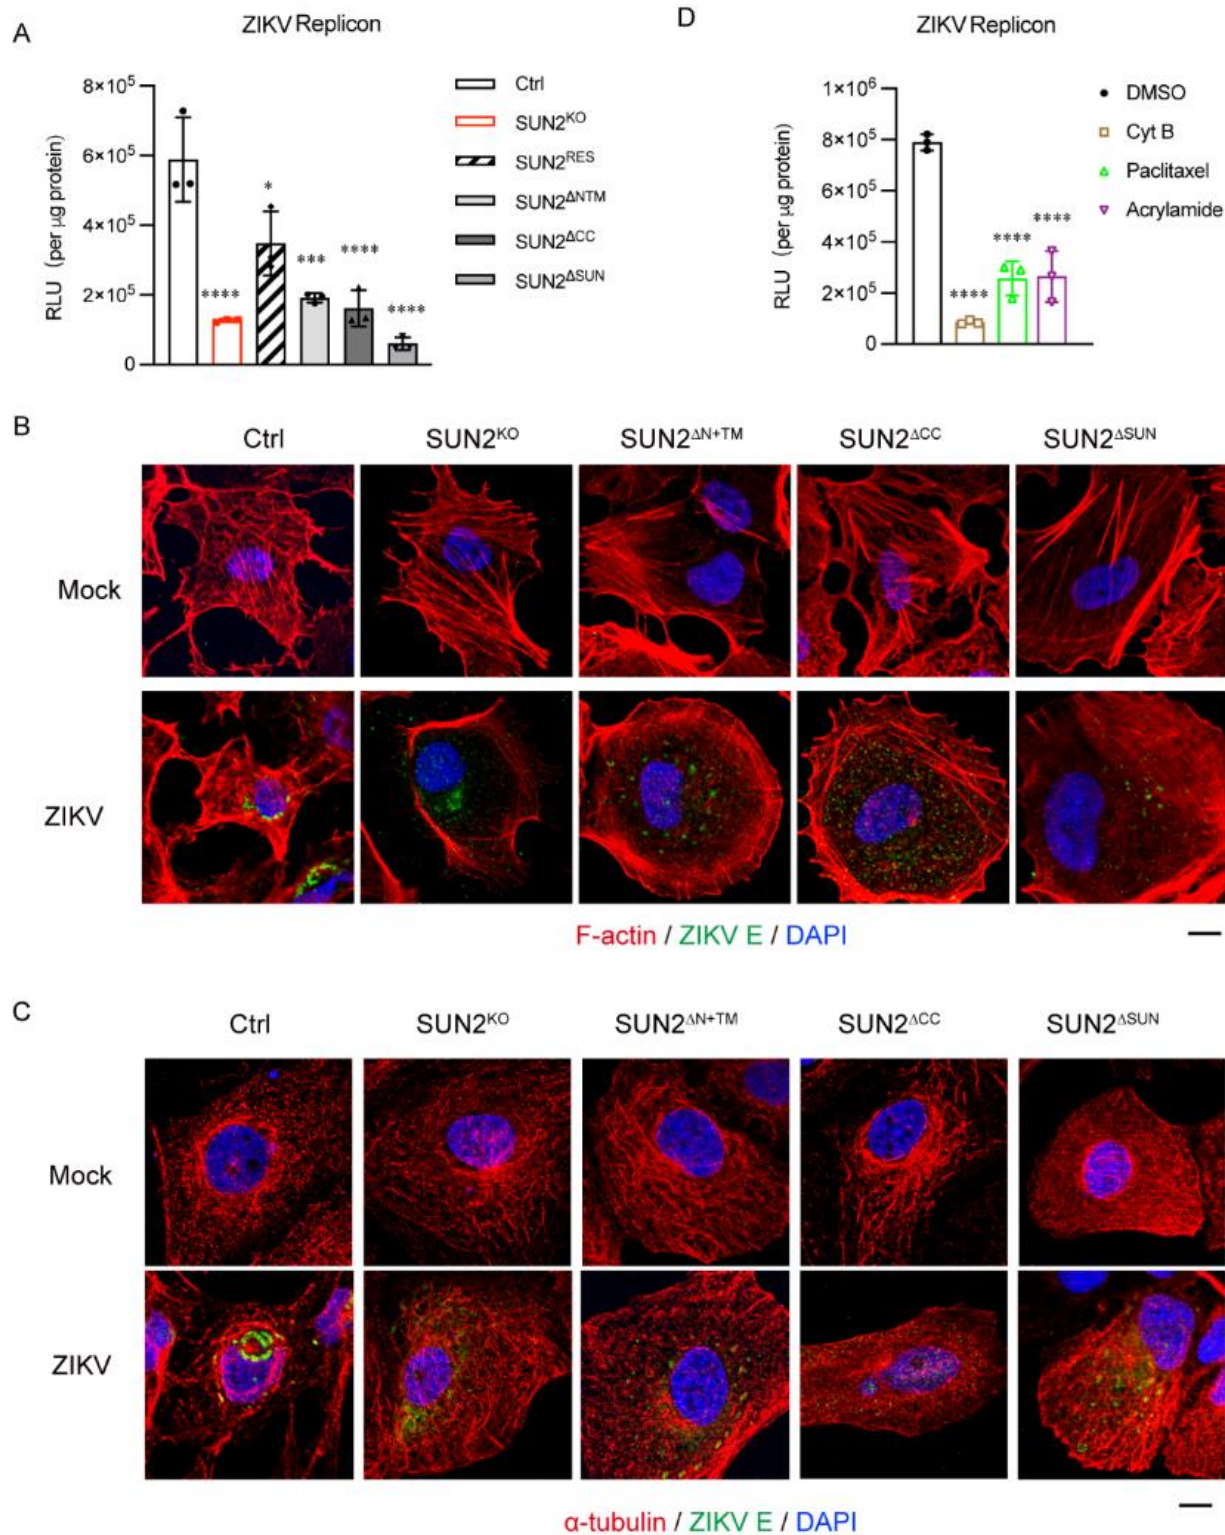

**Supplementary Figure 6. Three regions of SUN2 are essential for rearrangement of cytoskeleton induced by ZIKV.** (A) Replicon assay. Control, SUN2<sup>KO</sup>, SUN2<sup>RES</sup>, SUN2<sup>ΔN+TM</sup>,

SUN2<sup>ΔCC</sup>, and SUN2<sup>ΔSUN</sup> cells were transfected with ZIKV WT replicon RNAs. Cells were harvested at 24 h p.t. for luciferase assay. The data are shown as mean ± SD, n=3 biologically independent experiments. Statistical significance was determined using two-way ANOVA (\*,  $P < 0.1$ ; \*\*\*,  $P < 0.001$ ; \*\*\*\*,  $P < 0.0001$ ).  $p$  values:  $p < 0.0001$  (SUN2<sup>KO</sup>),  $p = 0.0510$  (SUN2<sup>RES</sup>),  $p = 0.0001$  (7 SUN2<sup>ΔN+TM</sup>),  $p < 0.0001$  (SUN2<sup>ΔCC</sup>),  $p < 0.0001$  (SUN2<sup>ΔSUN</sup>). (B, C) IFM assay. Control, SUN2<sup>KO</sup>, SUN2<sup>ΔN+TM</sup>, SUN2<sup>ΔCC</sup>, and SUN2<sup>ΔSUN</sup> cells were infected with ZIKV at an MOI of 8. At 24 h p.i., cells were fixed and stained to visualize ZIKV envelope (green), and nucleus (blue), F-actin (B, red), and α-tubulin (C, red). Representative images of three independent experiments are shown. Scale bars, 10 μm. Representative images of at least three independent experiments are shown. (D) Replicon assay. Huh7 cells were treated with cytochalasin B (10 μM), paclitaxel (10 μM), or acrylamide (2 μM) for 1 hour. Huh7 cells were transfected with ZIKV WT replicon RNAs, and harvested at 24 h p.t. for luciferase assay. The data are shown as mean ± SD, n=3 biologically independent experiments. Statistical significance was determined using two-way ANOVA (\*\*\*\*,  $P < 0.0001$ ).  $p$  values:  $p < 0.0001$  (Cyt B, paclitaxel, or acrylamide). Source data are provided as a Source Data file.

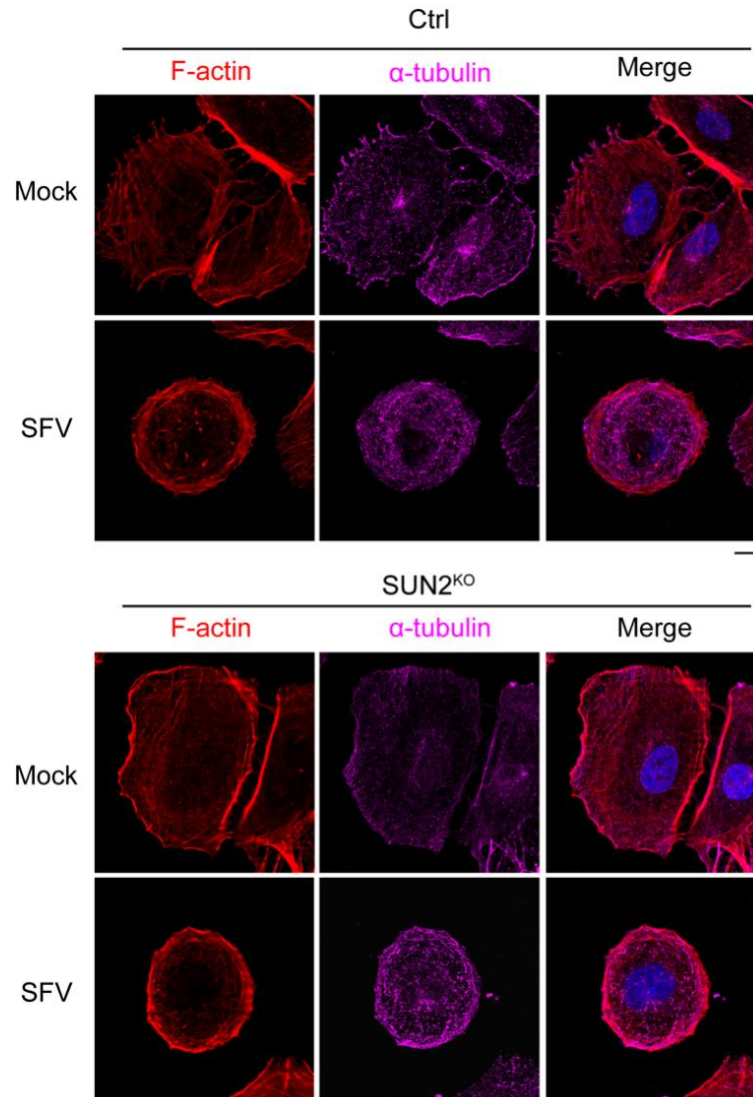

**Supplementary Figure 7. SUN2 does not affect rearrangement of F-actin and  $\alpha$ -tubulin induced by SFV infection.** Control and SUN2<sup>KO</sup> Huh7 cells were infected with SFV at an MOI of 3. Cells were fixed at 9 h p.i. and stained to visualize F-actin (red),  $\alpha$ -tubulin (magenta) and nucleus (blue). Representative images of three independent experiments are shown. Scale bars, 10  $\mu$ m.

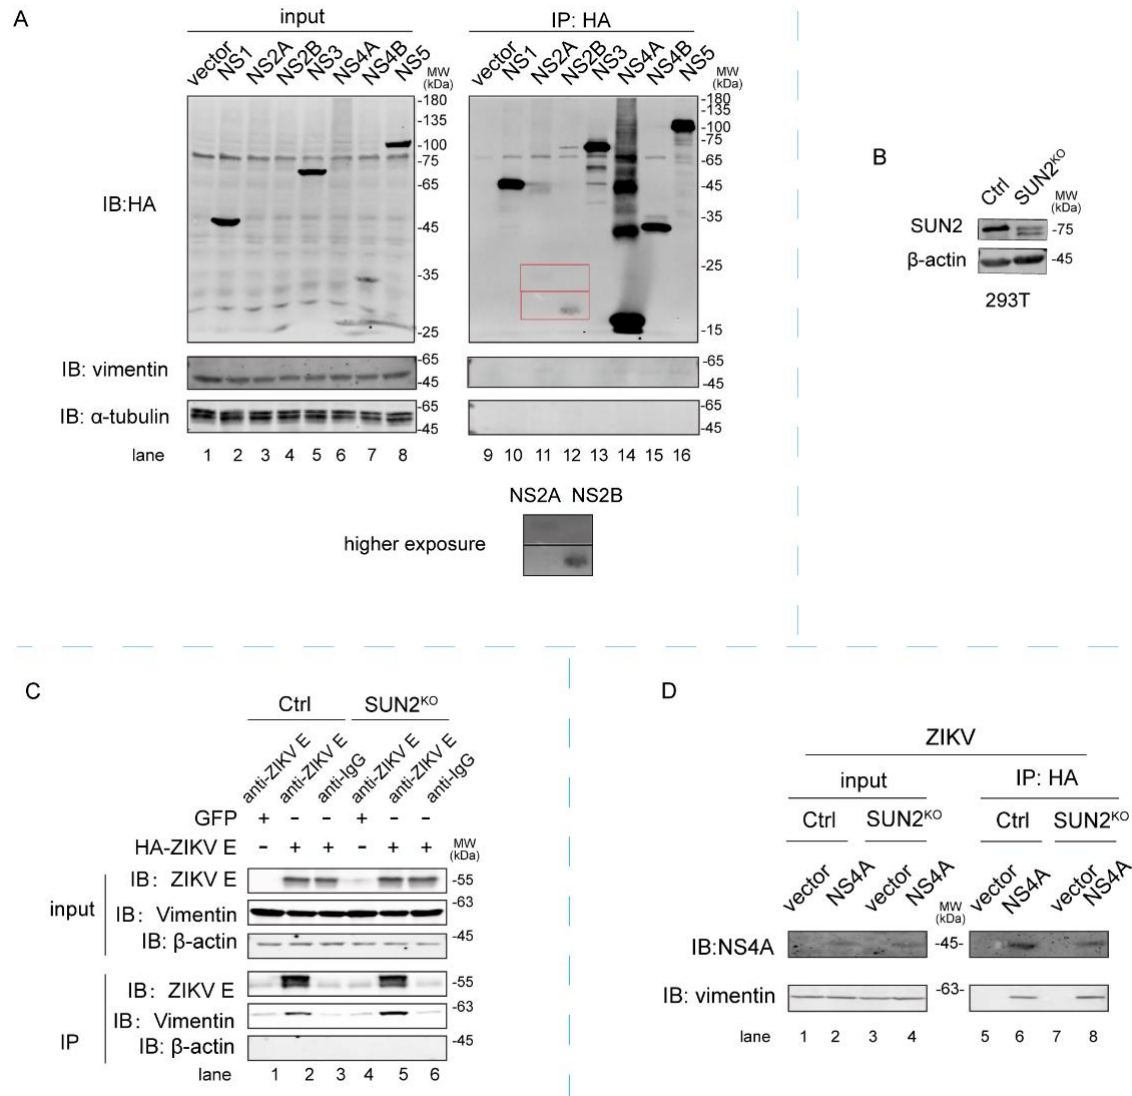

**Supplementary Figure 8. Interaction between ZIKV proteins and cytoskeleton proteins.** (A) 293T cells were transfected with plasmids expressing ZIKV HA-NS proteins for 48 h. Whole-cell extracts were prepared for co-IP assay using anti-HA agarose beads. Samples were detected by western blot using anti-HA, anti-vimentin, and anti-α-tubulin antibodies. (B) Western blot to confirm the knockout efficiency of SUN2 knockout 293T cells. (C) Control and SUN2<sup>KO</sup> 293T cells were transfected with the plasmid expressing ZIKV E protein for 48 h. Whole-cell extracts were prepared for co-IP assay using anti-E antibody. Samples were detected by western blot using anti-E, anti-vimentin, and anti-β-actin antibodies. (D) Control and SUN2<sup>KO</sup> Huh7 cells were transfected with plasmid expressing HA-NS4A, followed by infection with ZIKV at an MOI of 5 at 12 h p.t. Whole-cell extracts were harvested at 24 h p.i. for co-IP assay using anti-HA agarose beads. Samples were detected by western blot using anti-NS4A and anti-vimentin antibodies. Representative images of three independent experiments are shown. Source data are provided as a Source Data file.

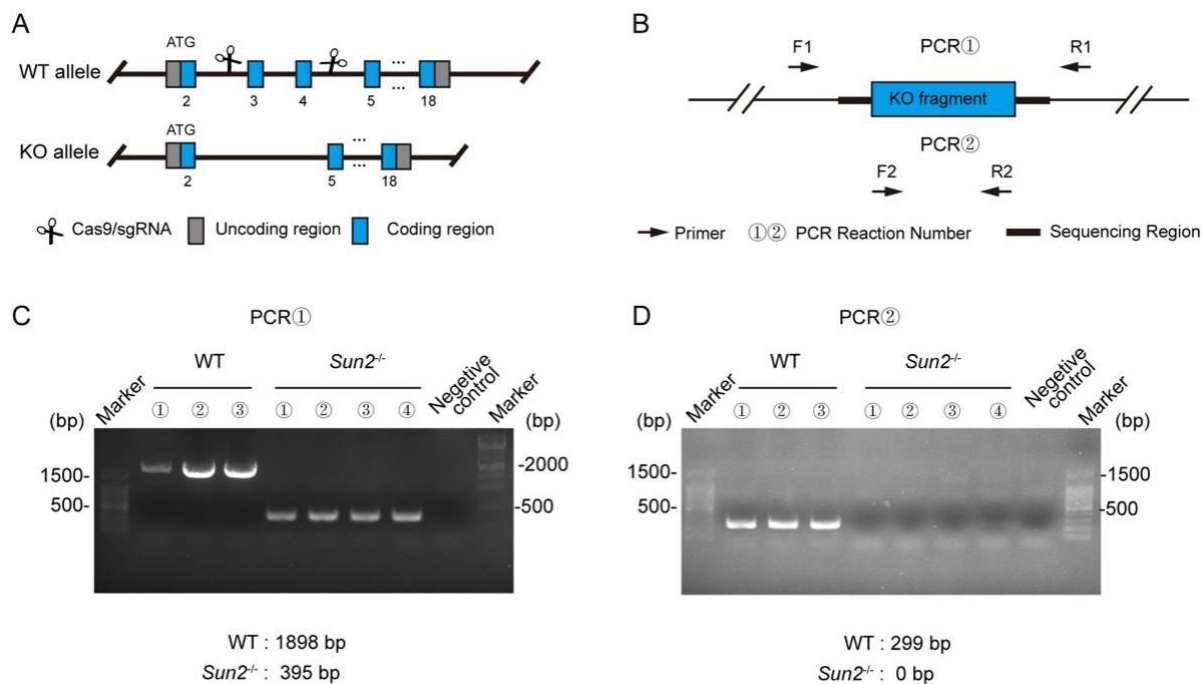

**Supplementary Figure 9. CRISPR/Cas9-based *Sun2* knockout strategy and verification of knockout effect in mice.** (A) Schematic diagram showed the CRISPR/Cas9 technology editing *Sun2* gene. (B) Schematic diagram showed the positions of PCR primers for genotyping. (C, D) Genotyping of *Sun2* in mice by PCR. The PCR products of WT mice are 1898 (primer set 1) or 299 (primer set 2) bp, and *Sun2* knockout mice are 395 (primer set 1) or 0 (primer set 2) bp. Representative images of three independent experiments are shown. Source data are provided as a Source Data file.



The prediction of NS1 and actin (cytoplasmic) interactions by AlphaFold2 Multimer

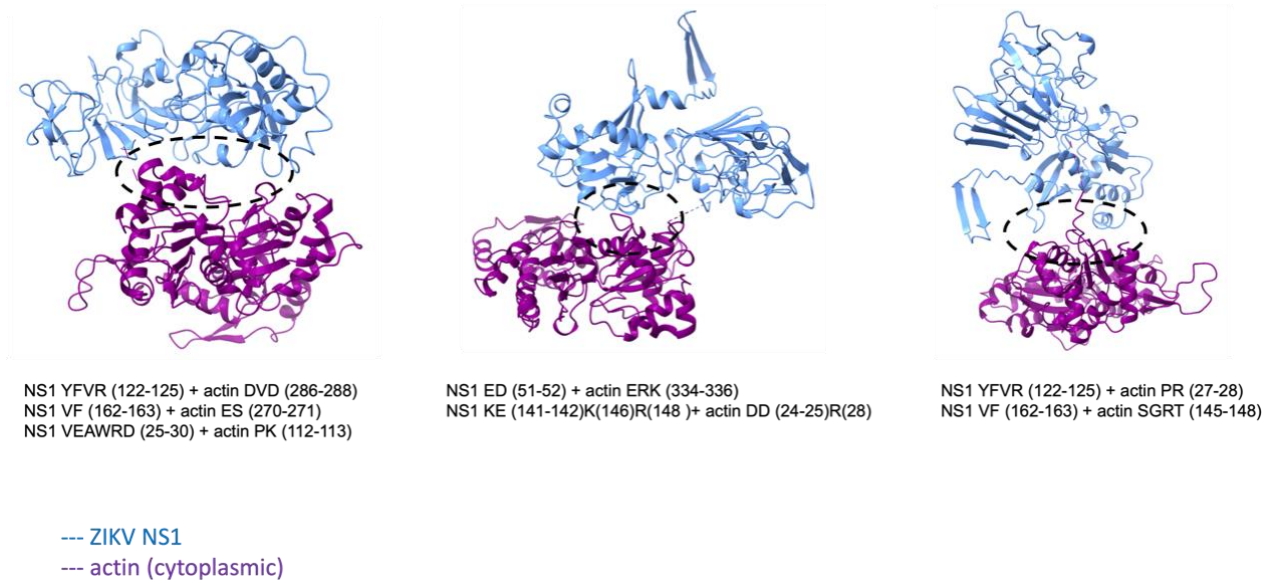

**Supplementary Figure 10. Prediction of potential interactions between NS1 and actin by AlphaFold2.** Structural prediction of ZIKV NS1 and host actin (cytoplasmic), and their potential interaction modes by AlphaFold2. The amino acids involved in the interaction interfaces are indicated under the predicted models.

## Supplementary Tables

**Supplementary Table 1. Primary antibodies used in western blot, IFM, and IHC**

| Antibody                              | Source                         | Identifier |
|---------------------------------------|--------------------------------|------------|
| SUN1 rabbit polyclonal Ab             | Proteintech                    | 24568-1-AP |
| SUN2 rabbit polyclonal Ab             | Proteintech                    | 27556-1-AP |
| ZIKV E rabbit polyclonal Ab           | GeneTex                        | GTX133314  |
| ZIKV E mouse monoclonal Ab            | GeneTex                        | GTX634155  |
| ZIKV NS1 rabbit polyclonal Ab         | GeneTex                        | GTX133307  |
| ZIKV NS3 rabbit polyclonal Ab         | GeneTex                        | GTX133320  |
| ZIKV NS4A rabbit polyclonal Ab        | GeneTex                        | GTX133704  |
| ZIKV NS5 rabbit polyclonal Ab         | GeneTex                        | GTX133312  |
| DENV2 NS1 mouse monoclonal Ab         | National Cheng Kung University | N/A        |
| HA-tag monoclonal Ab                  | MBL                            | M180-3     |
| $\beta$ -actin mouse monoclonal Ab    | Sigma                          | A1928      |
| vimentin mouse monoclonal Ab          | Proteintech                    | 60330-1-Ig |
| $\alpha$ -tubulin mouse monoclonal Ab | Ray Antibody Biotech           | RM2007     |
| Calnexin rabbit polyclonal Ab         | Proteintech                    | 10427-2-AP |
| Nesprin-1 rabbit monoclonal Ab        | Abcam                          | Ab192234   |
| Nesprin-1 rabbit monoclonal Ab        | HUABIO                         | ET7107-28  |
| mCherry rabbit polyclonal Ab          | Proteintech                    | 26765-1-AP |
| GAPDH rabbit monoclonal Ab            | Proteintech                    | 10494-1-AP |

**Supplementary Table 2. Sequences of primers used in qRT-PCR**

| Gene                            | Sequence (5'-3')                                           |
|---------------------------------|------------------------------------------------------------|
| ZIKV <i>NS1</i>                 | 5F, GTCAGAGCAGCAAAGACAA<br>3R, CAGCCTCCTTTCCCTTAACA        |
| DENV2 <i>C</i>                  | 5F, TCCTAACAATCCCACCAACAGCA<br>3R, AGTTCTGCGTCTCCTGTTCAAGA |
| <i><math>\beta</math>-actin</i> | 5F, GCTCCTCCTGAGCGCAAG<br>3R, CATCTGCTGGAAGGTGGACA         |

**Supplementary Table 3. Sequences of primers used in CRISPR/Cas9 editing**

| Gene        | Primer    | Sequence (5'-3')      |
|-------------|-----------|-----------------------|
| <i>SUN1</i> | sgRNA1-5F | CGGGCTACACGTATGCGCTC  |
|             | sgRNA1-3R | GAGCGCATACGTGTAGCCCG  |
| <i>SUN1</i> | sgRNA2-5F | GTCCCGCCGTAGTTTGCGCC  |
|             | sgRNA2-3R | GGCGCAAACCTACGGCGGGAC |
| <i>SUN2</i> | sgRNA1-5F | CAGCAGCGGAGGGAGCTCGG  |
|             | sgRNA1-3R | CCGAGCTCCCTCCGCTGCTG  |
| <i>SUN2</i> | sgRNA2-5F | CGCCTCACGCGCTACTCCCA  |
|             | sgRNA2-3R | TGGGAGTAGCGCGTGAGGCG  |

**Supplementary Table 4. Sequences of oligonucleotides used in cloning**

| Primers         | Sequence (5'-3')                                                                                                         |
|-----------------|--------------------------------------------------------------------------------------------------------------------------|
| SUN2-CDS        | 5F, ATGTCCCGAAGAAGCCAGCGC<br>3R, CATGGGGAGCCCGCCCACTAG                                                                   |
| SUN2-RES-sgRNA1 | 5F, AGCAGCGGAGGGAGTTTCAGTAGCAGGAGCTGGGAGTCAG<br>3R, CTGACTCCCAGCTCCTGCTACTGAACTCCCTCCGCTGCT                              |
| $\Delta N+TM$   | 5F, ATGAAGGACAGCAGGAGGCCG<br>3R, CATGGGGAGCCCGCCCACTAG                                                                   |
| $\Delta CC-1$   | 5F, ATGTCCCGAAGAAGCCAGCGC<br>3R, CAGCGTCAGGCTCAGAACACGCTGCTCAGC                                                          |
| $\Delta CC-2$   | 5F, GCTGAGCAGCGTGTTCTGAGCCTGACGCTG<br>3R, CATGGGGAGCCCGCCCACTAG                                                          |
| $\Delta SUN$    | 5F, ATGTCCCGAAGAAGCCAGCGC<br>3R, TACGCCCTGGAGTCAGGAGGGTAG                                                                |
| E               | 5F, ATCAAACAAGTTTGTACAAAAAAGC<br>3R, ATCGAACCACCTTTGTACAAGAAAGC                                                          |
| NS1             | 5F, ATGGATGTGGGGTGCTC<br>3R, TGCAGTCACCATTGACCTTAC                                                                       |
| NS2A            | 5F, ATGGGATCAACTGATCACATG<br>3R, CCGCTTCCCACTCCTTGTGA                                                                    |
| NS2B            | 5F, ATGAGCTGGCCCCCTA<br>3R, CCTTTTTCCAGTCTTCACGTA                                                                        |
| NS3             | 5F, ATGAGTGGTGCTCTATGGGAT<br>3R, TCTTTTCCCAGCGGCAAACCTC                                                                  |
| NS4A            | 5F, ATGGGAGCGGCTTTTGGAG<br>3R, GGCGGTAATCAAGCCCAGAAG                                                                     |
| NS4B            | 5F, ATGAATGAACTCGGATGGTTGGA<br>3R, ACGTCTCTTGACCAAGCCAGC                                                                 |
| NS5             | 5F, ATGGGGGGGTGGAACAGG<br>3R, CAGCACTCCAGGTGTGGACCC                                                                      |
| mCherry         | 5F,<br>TTCCATTTTCAGGTGTCGTGAGGATCCATGGTGAGCAAGGGGCGAGGA<br>3R,<br>CGGCCGCCCTCGAGGAATTCACGCGTCTTGTACAGCTCGTCCATGC         |
| mCherry-SEC61B  | 5F,<br>GCATGGACGAGCTGTACAAGGGTGGTGGTCCTGGTCCGACCCCCAGT<br>GG<br>3R,<br>CTAGAGCGGCCGCCCTCGAGGAATTCCTACGAACGAGTGTACTTGC    |
| DN-KASH1        | 5F,<br>GCATGGACGAGCTGTACAAGGGTGGTGGTCGCGGCTTCCTGTTTCTGAG<br>GT<br>3R,<br>CTAGAGCGGCCGCCCTCGAGGAATTCCTCAGAGTGGAGGAGGGCCAT |



|          |                                                                                                                       |
|----------|-----------------------------------------------------------------------------------------------------------------------|
| DN-KASH2 | 5F,<br>GCATGGACGAGCTGTACAAGGGTGGTGGTGCAGTGAGAACTACAGAA<br>GG<br>3R,<br>CTAGAGCGGCCGCCCTCGAGGAATTCCTATGTGGGGGGTGGCCCAT |
|----------|-----------------------------------------------------------------------------------------------------------------------|

**Supplementary Table 5. Sequences of primers used in SUN2<sup>KO</sup> mice validation**

| Primers | Sequence (5'-3')                                             |
|---------|--------------------------------------------------------------|
| PCR①    | 5F, ACGACAGAGTTGTCGTAAGCTGG<br>3R, AATAGCACTGACTGCTTCGAGC    |
| PCR②    | 5F, CTGTCTCTAACTGACGGGTTTGC<br>3R, TCGAACCACAGACTCGCTGTAGTAG |
